# Supplementary material
Source: PubMed Central journal article supplement (PMC2945594)

**CONTROL OF AmtB-GlnK COMPLEX FORMATION BY INTRACELLULAR LEVELS OF  
ATP, ADP AND 2-OXOGLUTARATE**

**Martha V. Radchenko, Jeremy Thornton and Mike Merrick**

From the Department of Molecular Microbiology, John Innes Centre, Norwich NR4 7UH, United Kingdom

Running head: Control of the AmtB-GlnK complex formation by effectors

Address correspondence to: Mike Merrick, Department of Molecular Microbiology, John Innes Centre, Norwich NR4 7UH, United Kingdom. Tel.: +44-1603-450749; Fax: +44-1603-450778; E-mail: [mike.merrick@bbsrc.ac.uk](mailto:mike.merrick@bbsrc.ac.uk)

Supplemental Figure S1

Isothermal titration calorimetry (ITC). ATP (A, B, C) or ADP (D, E, F) was injected into GlnK solution in the presence of 1 mM 2-OG (A, D), 0.1 mM 2-OG (B, E) or 0.1 mM 2-OG with equimolar solutions of GlnK plus AmtB (C, F).

# Figure S1

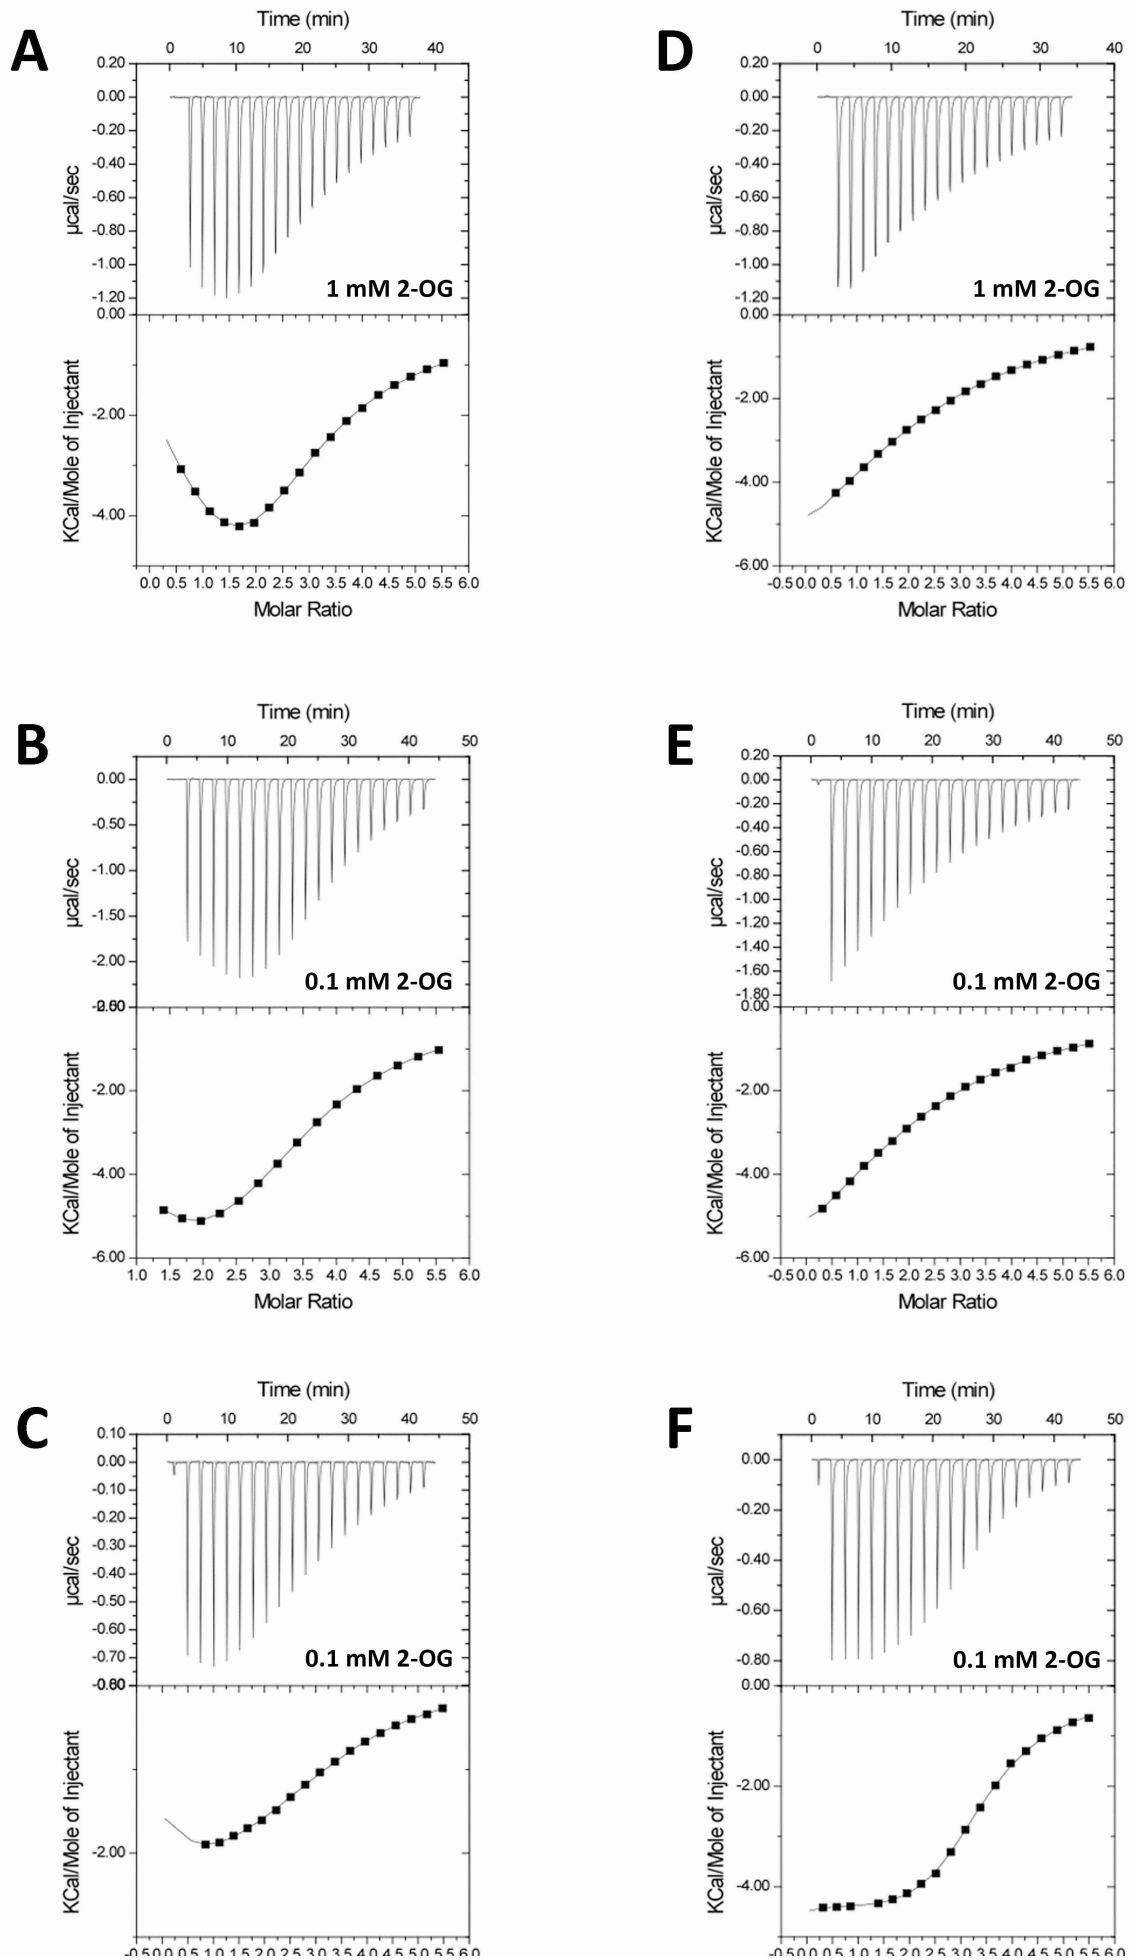

Supplement: supp_M110.153908_jbc.M110.153908-1.pdf [file supp_M110.153908_jbc.M110.153908-1.pdf]
